# Supplementary material
Source: MDPI journal article supplement (https://www.mdpi.com/2073-4344/8/6/228)
Supplement: s1 [file s1]

# Supplementary Material: On the Impact of Preparation Method on the Surface Basicity of Mg-Zr Mixed Oxide Catalysts for Tributyrin Transesterification

Abdallah I. M. Rabee <sup>1</sup>, Jinesh C. Manayil <sup>2</sup>, Mark A. Isaacs <sup>2</sup>, Christopher M. A. Parlett <sup>2</sup>, Lee J. Durndell <sup>2</sup>, Mohamed I. Zaki <sup>1,\*</sup>, Adam F. Lee <sup>3,\*</sup> and Karen Wilson <sup>3,\*</sup>

<sup>1</sup> Chemistry Department, Faculty of Science, Minia University, El-Minia 61519, Egypt; aimoftah@mu.edu.eg

<sup>2</sup> European Bioenergy Research Institute, School of Engineering and Applied Sciences, Aston University, Aston Triangle, B4 7ET Birmingham, UK; cmjinesh@gmail.com (J.C.M.); mark.isaacs@ucl.ac.uk (M.A.I.); c.parlett@aston.ac.uk (C.M.A.P.); l.j.durndell@uu.nl (L.J.D.)

<sup>3</sup> School of Science, RMIT University, Melbourne, Victoria 3001, Australia

\* Correspondence: mizaki@mu.edu.eg (M.I.Z.); adam.lee2@rmit.edu.au (A.F.L.); karen.wilson2@rmit.edu.au (K.W.)

Received: 9 May 2018; Accepted: 25 May 2018; Published: date

## 1. Tables

**Table S1.** Elemental analysis of MZ catalysts prepared from hydroxide (MZ-HD) or citrate-mediated (MZ-CT) routes.

| Nominal MgO /<br>wt% | Bulk MgO <sup>a</sup><br>/wt% | Surface content/ atom% <sup>b</sup> |      | Mg:Zr atomic<br>ratio <sup>a</sup> | Mg:Zr<br>atomic ratio <sup>b</sup> |
|----------------------|-------------------------------|-------------------------------------|------|------------------------------------|------------------------------------|
|                      |                               | Mg                                  | Zr   |                                    |                                    |
| ZrO <sub>2</sub> -HD | 0.00                          | 0.00                                | 30.9 |                                    |                                    |
| 1MZ-HD               | 2.10                          | 6.2                                 | 22.8 | 0.08                               | 0.27                               |
| 2MZ-HD               | 6.34                          | 6.0                                 | 20.3 | 0.25                               | 0.44                               |
| 3MZ-HD               | 7.94                          | 12.2                                | 19.3 | 0.32                               | 0.63                               |
| 4MZ-HD               | 10.87                         | 18.4                                | 15.0 | 0.46                               | 1.23                               |
| 5MZ-HD               | 16.20                         | 21.4                                | 13.1 | 0.73                               | 1.63                               |
| 6MZ-HD               | 18.21                         | 21.8                                | 14.5 | 0.84                               | 1.53                               |
| ZrO <sub>2</sub> -CT | 0.00                          | 0.0                                 | 33.4 |                                    |                                    |
| 1MZ-CT               | 1.92                          | 3.2                                 | 21.0 | 0.07                               | 0.15                               |
| 2MZ-CT               | 3.70                          | 4.9                                 | 21.6 | 0.14                               | 0.23                               |
| 3MZ-CT               | 5.70                          | 7.6                                 | 23.4 | 0.23                               | 0.32                               |
| 4MZ-CT               | 8.71                          | 9.3                                 | 20.4 | 0.36                               | 0.46                               |
| 5MZ-CT               | 10.21                         | 10.3                                | 17.8 | 0.43                               | 0.58                               |
| 6MZ-CT               | 14.27                         | 14.1                                | 14.8 | 0.62                               | 0.96                               |

<sup>a</sup>ICP-OES. <sup>b</sup>XPS.

**Table S2.** MgO mass loss from fresh 18.2MZ-HD catalyst as a function of recycle during tributyrin transesterification with methanol.

| Reaction | Leached MgO (wt %) |
|----------|--------------------|
| 1        | 0.83               |
| 2        | 0.71               |
| 3        | 0.96               |

## 2. Figures

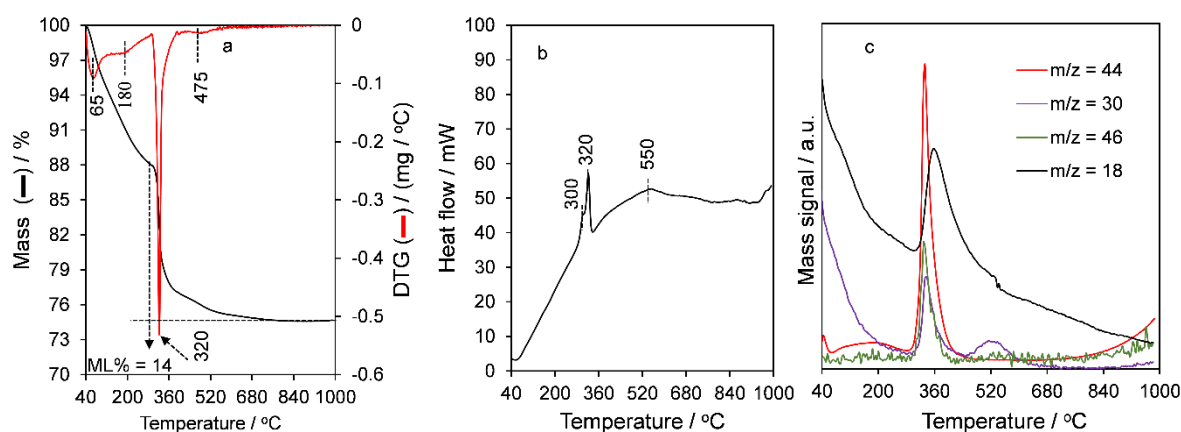

**Figure S1.** (a) TGA/DTG, (b) DSC, and (c) MS signals for evolved gas species during thermal decomposition of  $(\text{CH}_3\text{O})_2\text{Mg}$ -impregnated zirconium hydroxide precursor under flowing  $\text{N}_2:\text{O}_2$  (2:1 volume ratio,  $60 \text{ cm}^3 \cdot \text{min}^{-1}$ ).

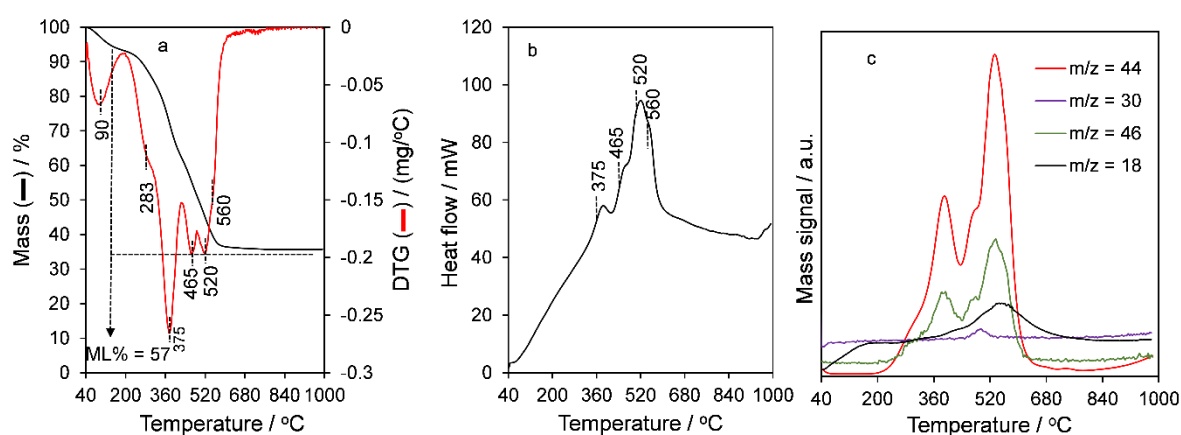

**Figure S2.** (a) TGA/DTG, (b) DSC, and (c) MS signals for evolved gas species during thermal decomposition of citrate-mediated sol-gel under flowing  $\text{N}_2:\text{O}_2$  (2:1 volume ratio,  $60 \text{ cm}^3 \cdot \text{min}^{-1}$ ).

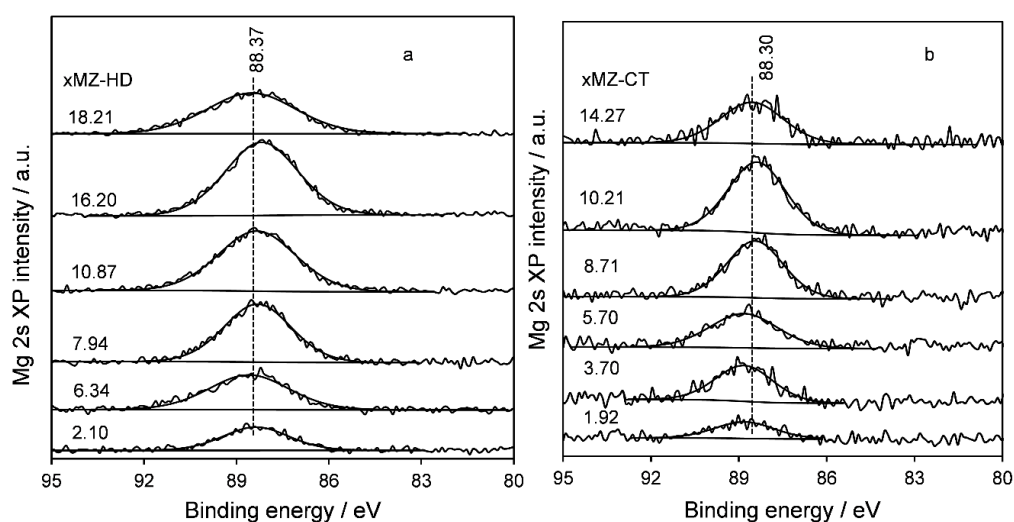

**Figure S3.** Mg 2s XP spectra of (a) xMZ-HD, and (b) xMZ-CT mixed oxides.

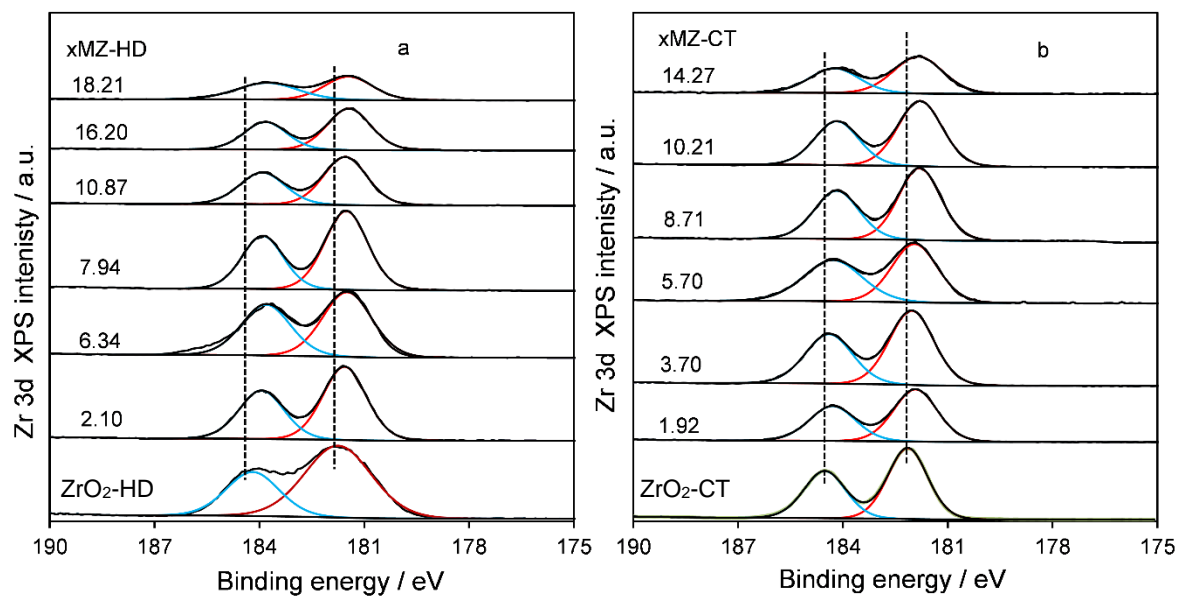

Figure S4. Zr 3d XP spectra of (a) xMZ-HD, and (b) xMZ-CT mixed oxides.

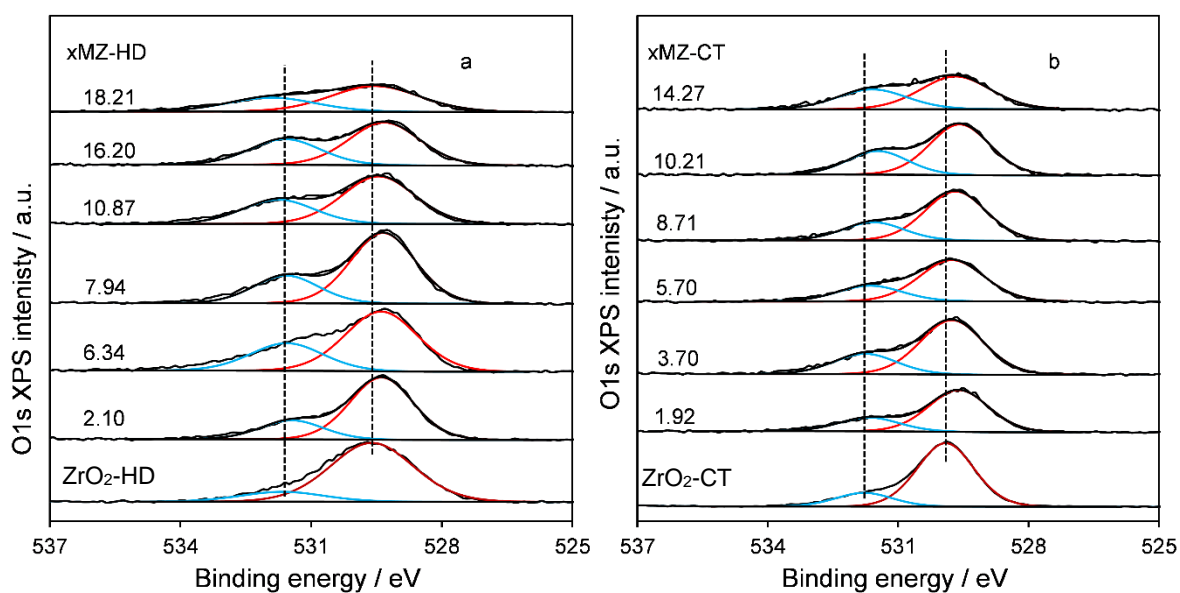

Figure S5. O 1s XP spectra of (a) xMZ-HD, and (b) xMZ-CT mixed oxides.

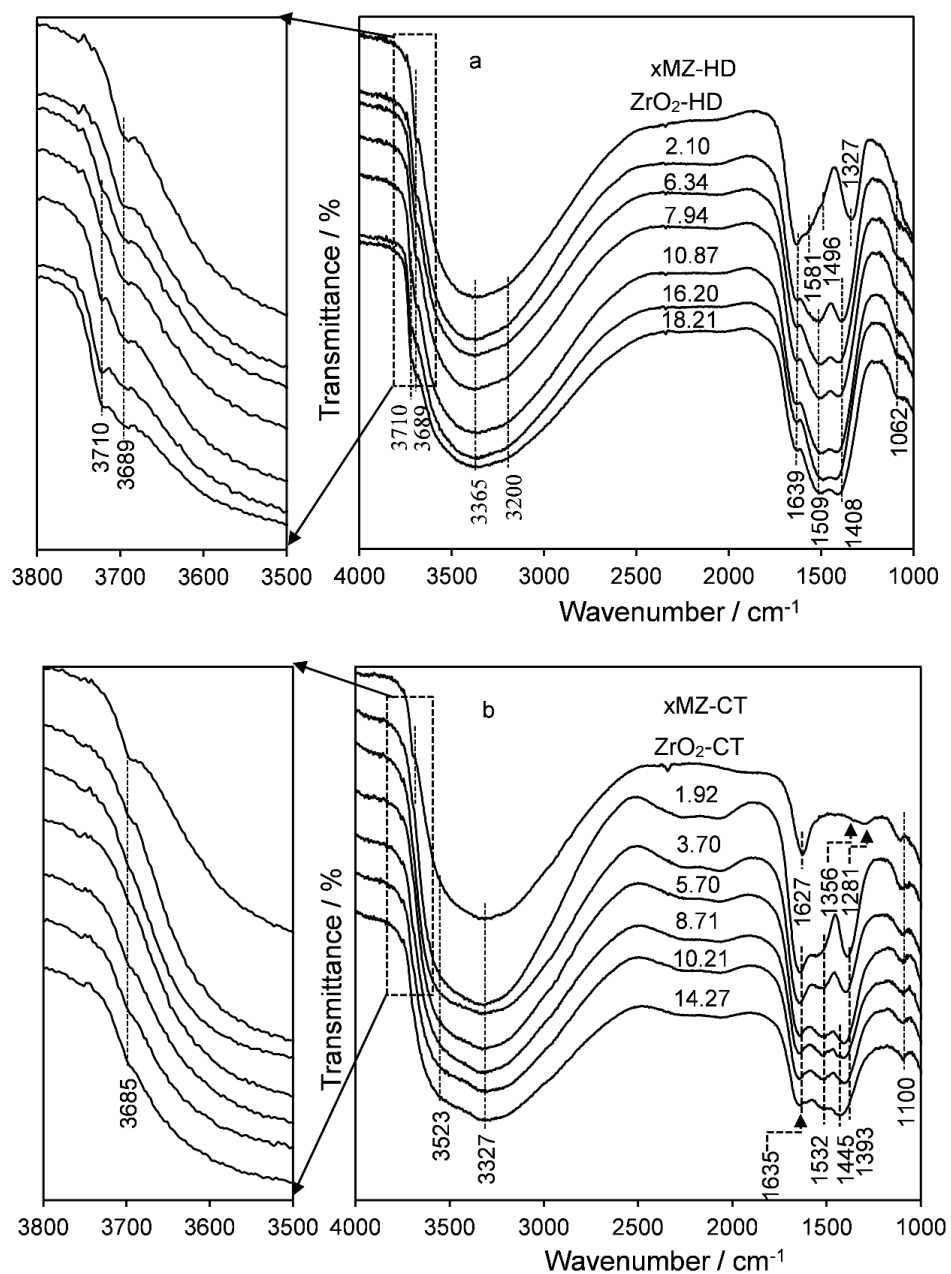

Figure S6. DRIFT spectra of (a) xMZ-HD, and (b) xMZ-CT mixed oxides.

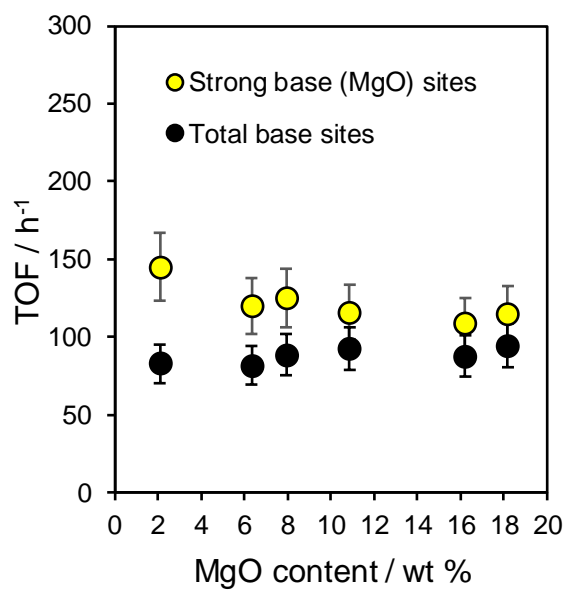

**Figure S7.** Comparison of TOF for tributyrin transesterification calculated per total base or per strong base (MgO) site.

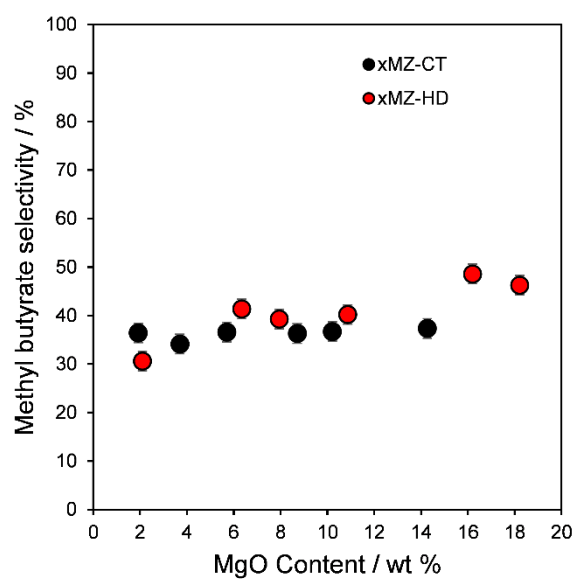

**Figure S8.** Methyl butyrate selectivity at 20 % iso-conversion for metal oxides.

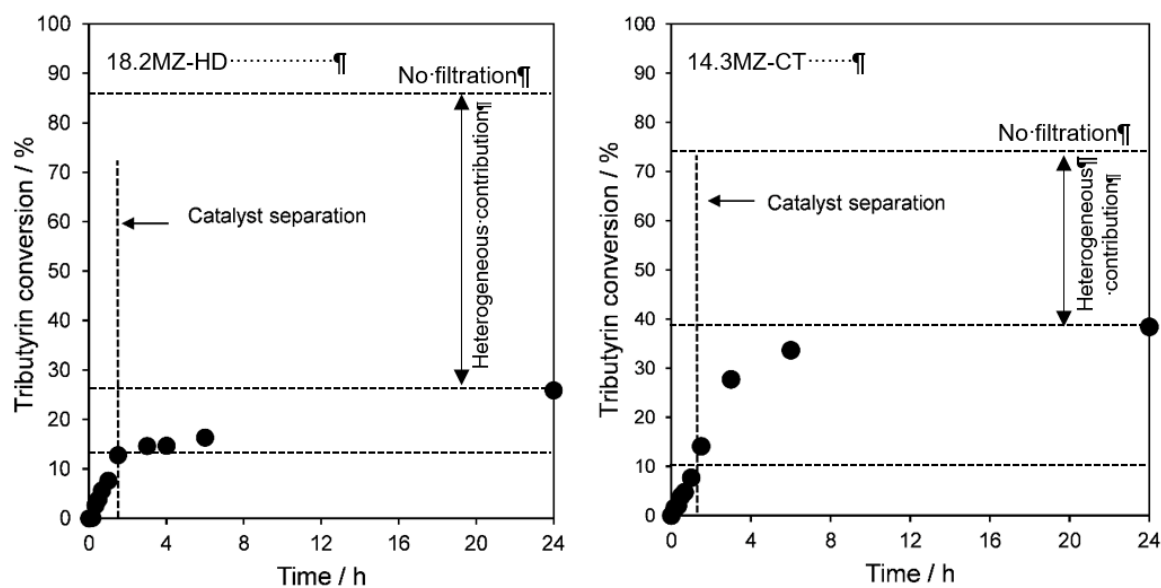

**Figure S9.** Hot filtration tests to assess  $Mg^{2+}$  leaching in tributyrin transesterification over the indicated catalyst (catalyst was removed after 1.5 h).

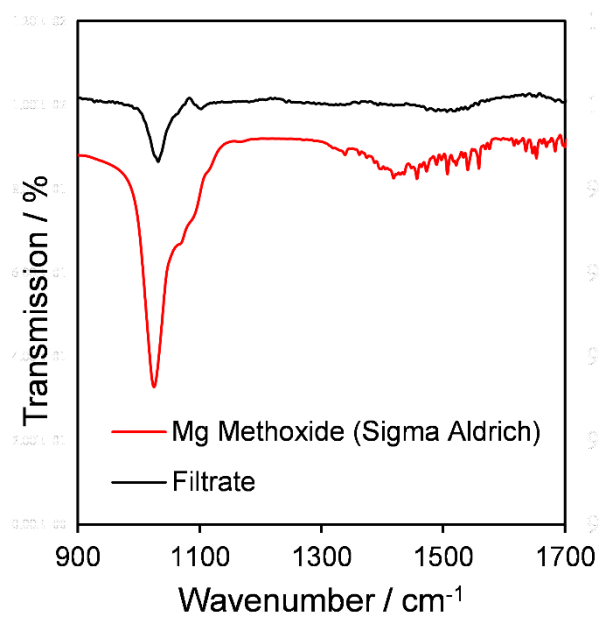

**Figure S10.** ATR-FTIR spectra of commercial magnesium methoxide solution and the supernatant post-reaction after 18.2MZ-HD catalyst.

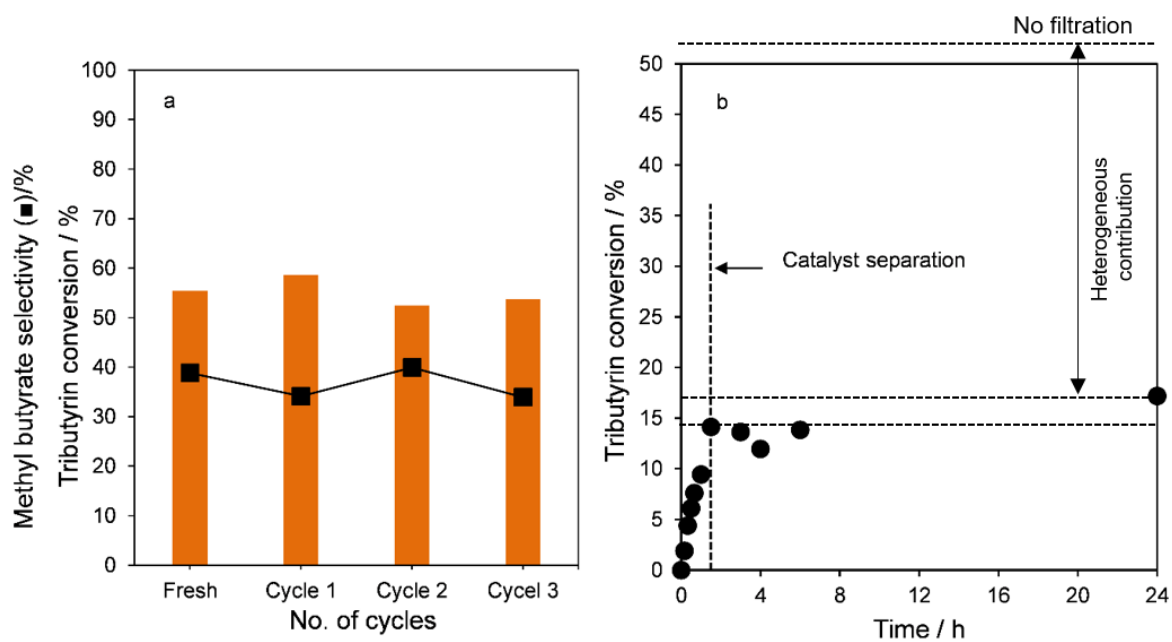

**Figure S11.** (a) Tributyrin conversion and methyl butyrate selectivity as a function of recycle, and (b) hot filtration tests to assess  $Mg^{2+}$  leaching over 8.7MZ-CT.

© 2018 by the authors. Submitted for possible open access publication under the

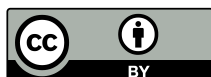

terms and conditions of the Creative Commons Attribution (CC BY) license (<http://creativecommons.org/licenses/by/4.0/>).
